# Supplementary material
Source: HighWire-hosted journal article supplement (http://gut.bmjjournals.com/highwire/filestream/193115/field_highwire_adjunct_files/2/Supplemental_NKT_figures.pdf)

Supplemental Fig 1

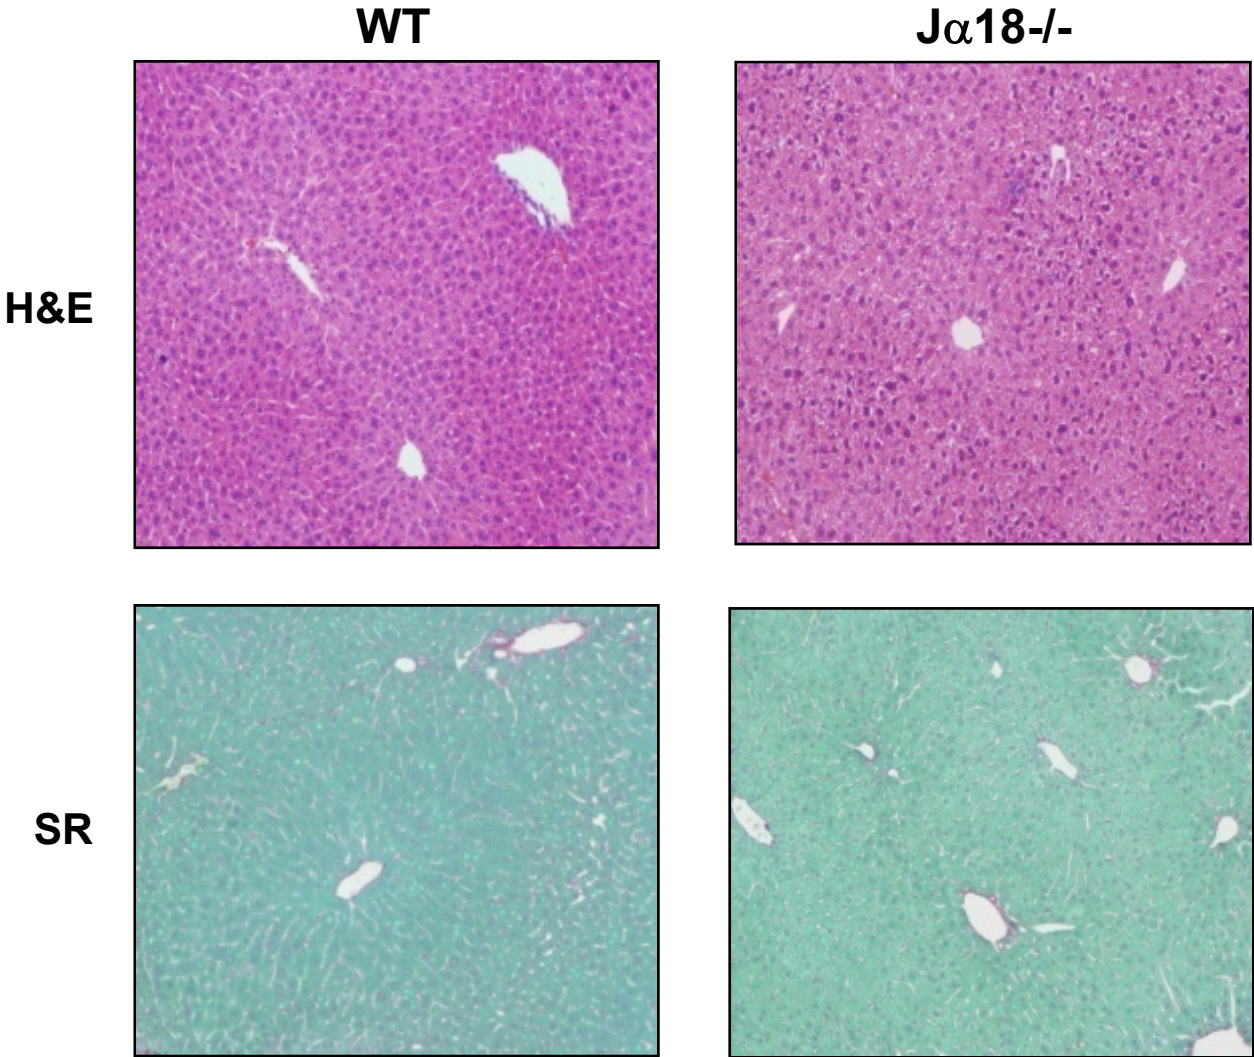

# Supplemental Fig 2

## A

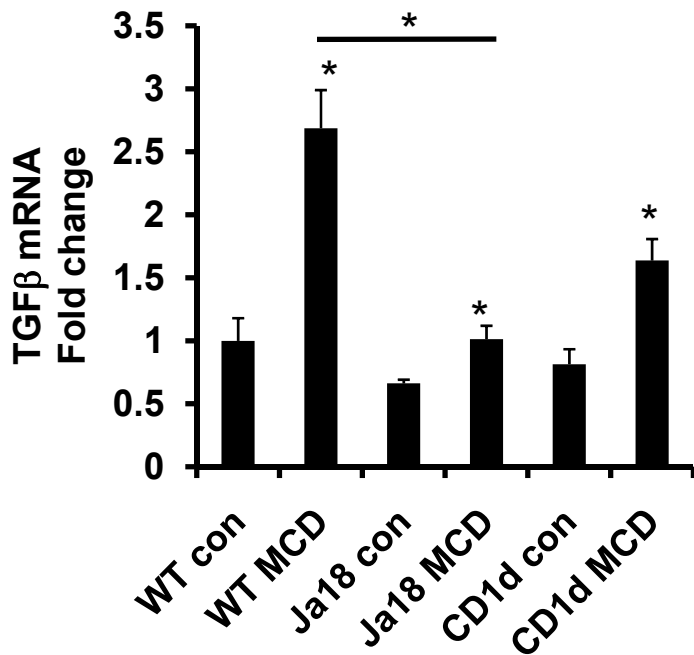

## B

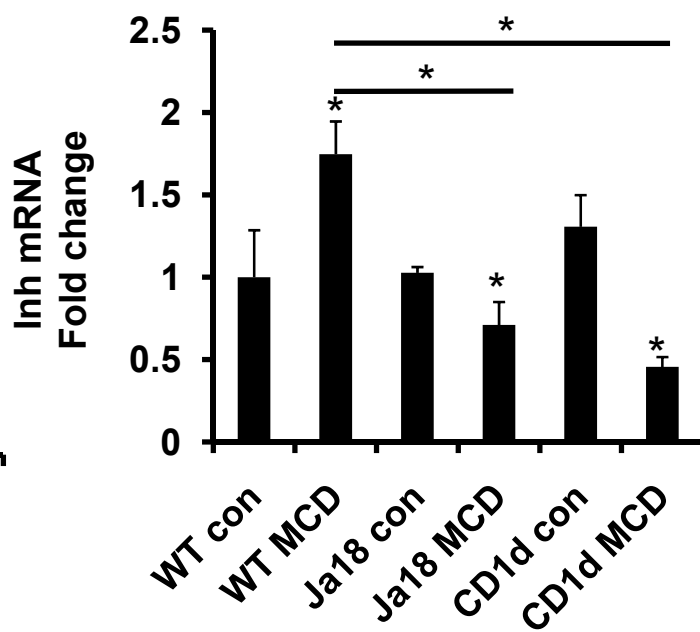

## C

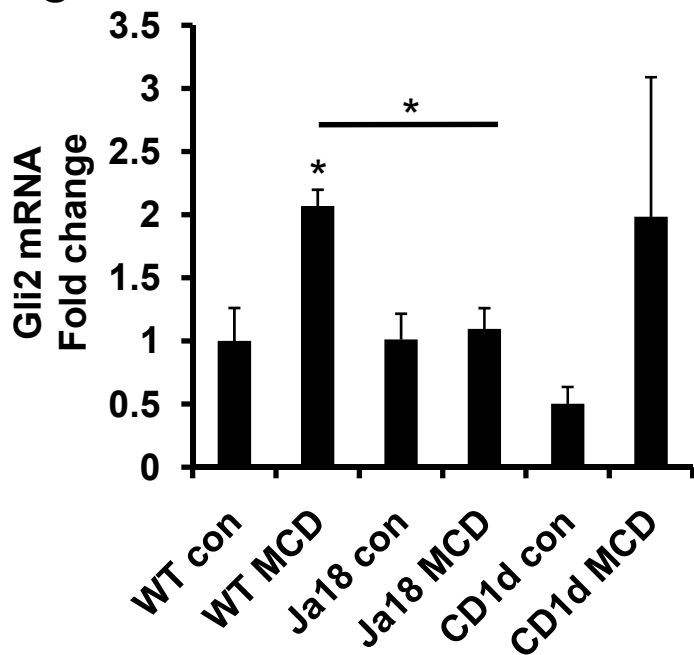

# Supplemental Fig 3

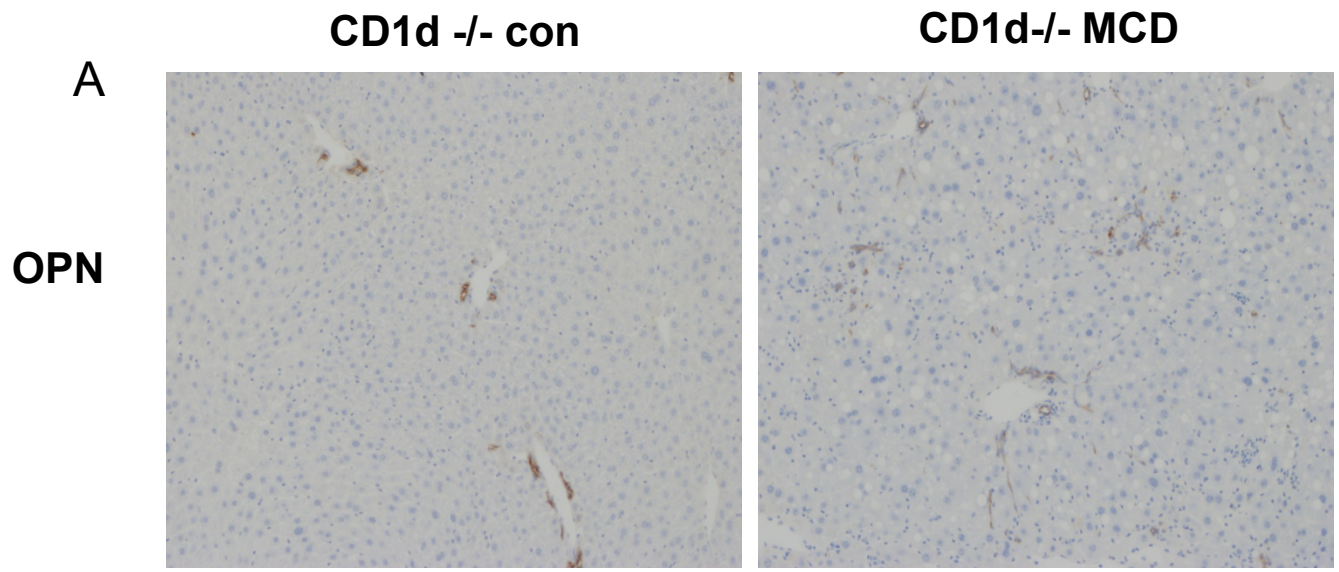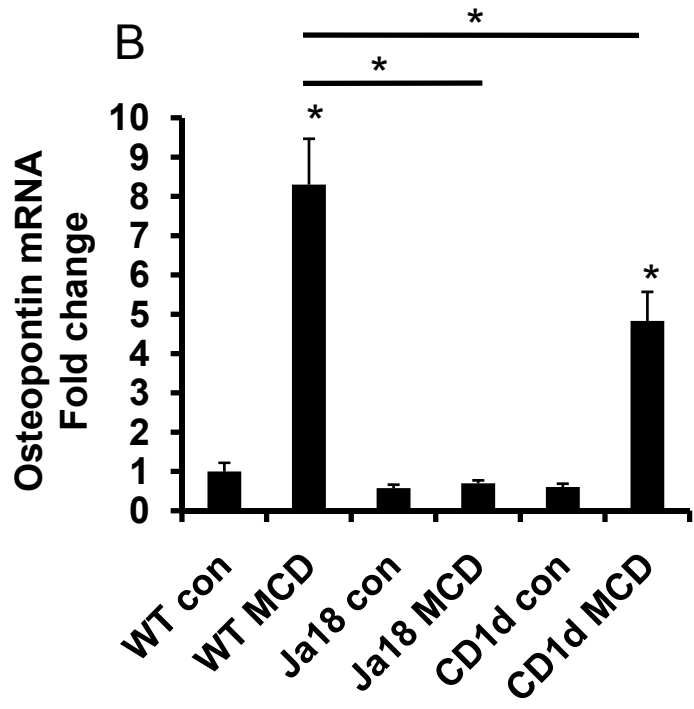

# Supplemental Fig 4

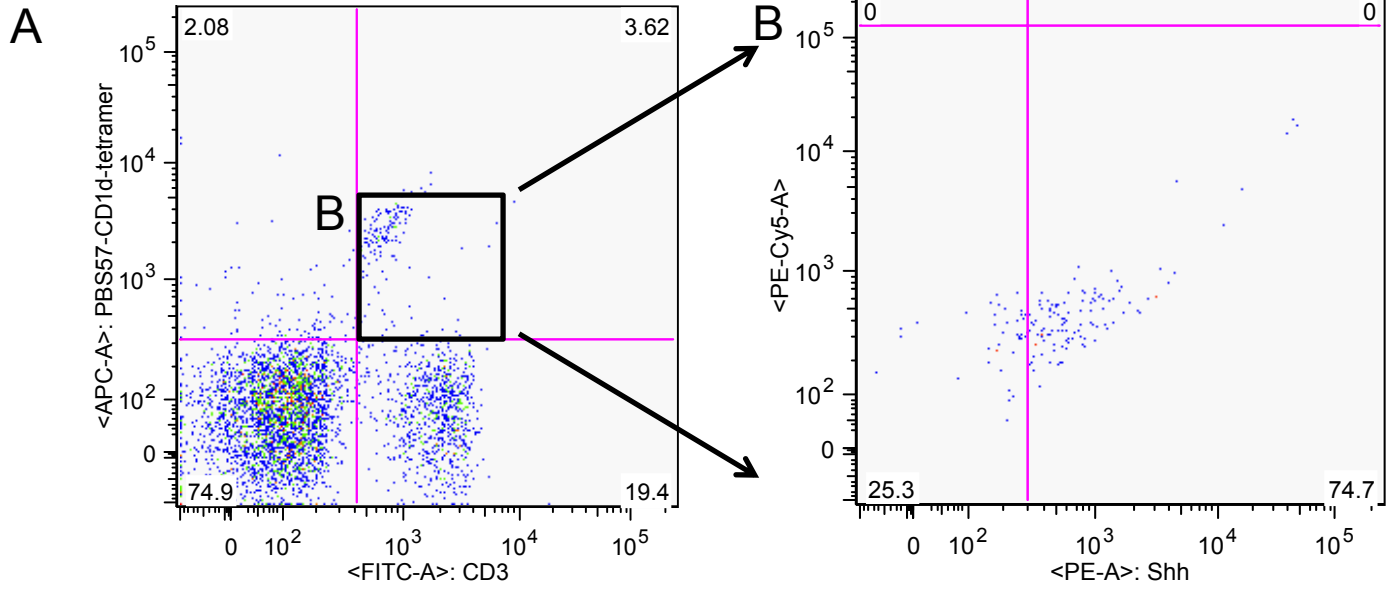



Supplemental Figure 5

**Early fibrosis**

**Advanced fibrosis**

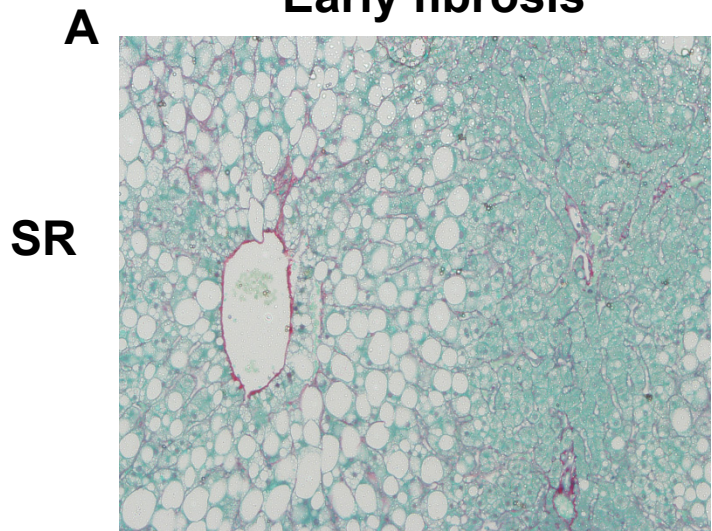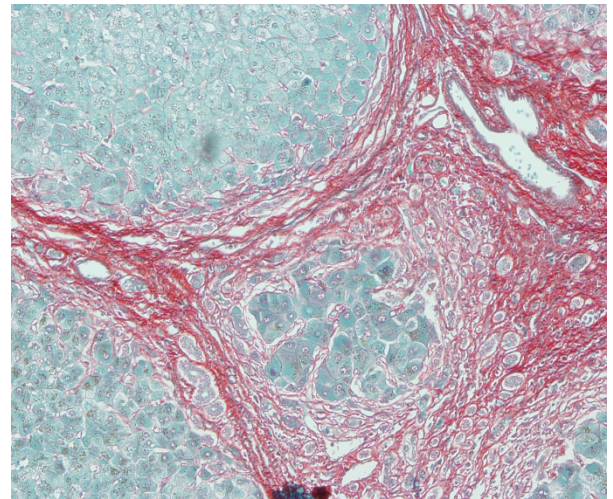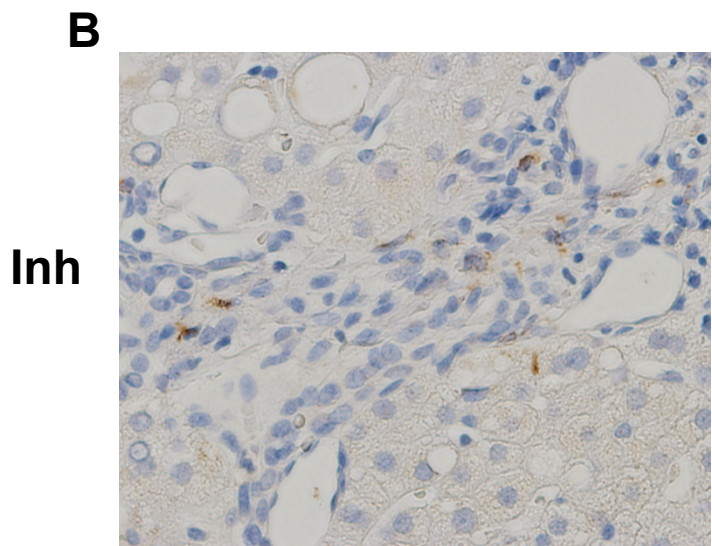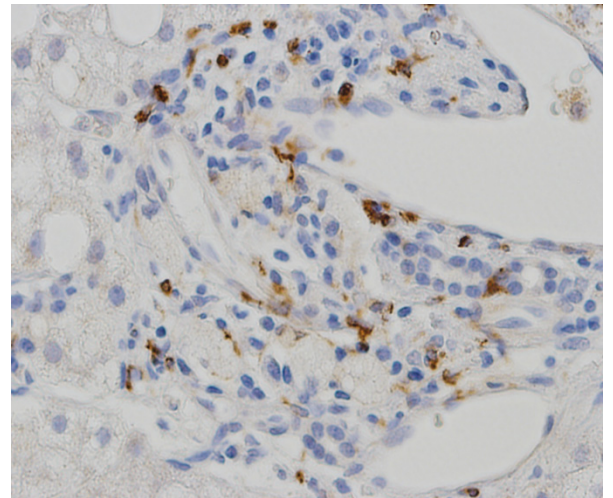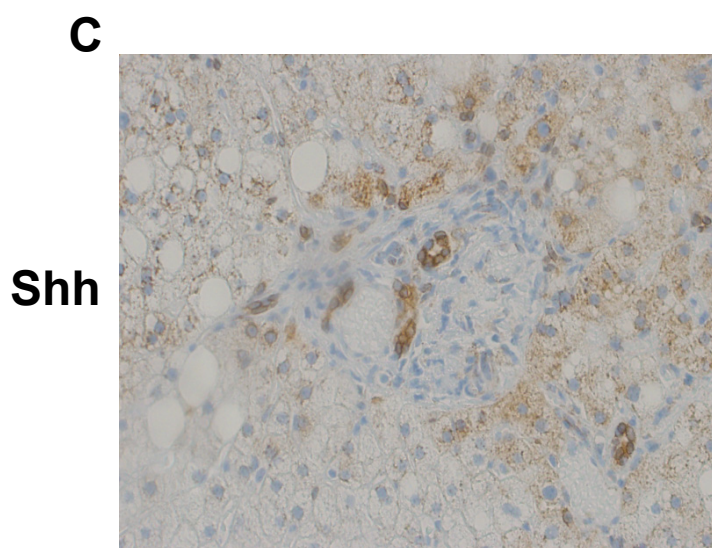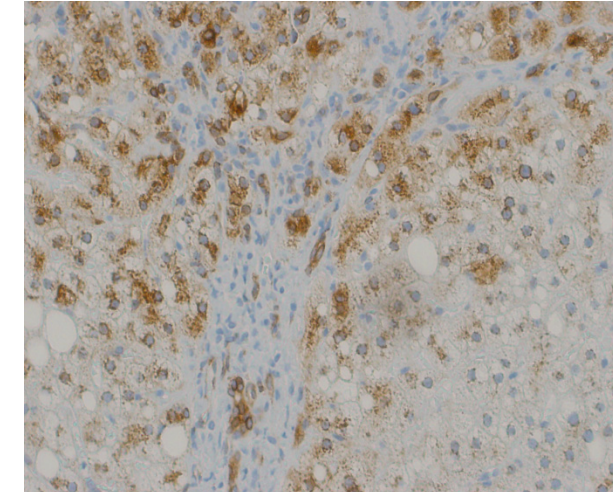



# Supplemental Figure 6

**A**

Early NASH

Advanced NASH

**Gli2**

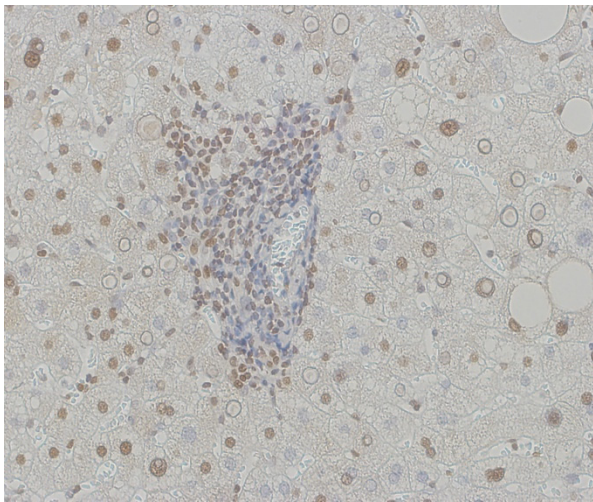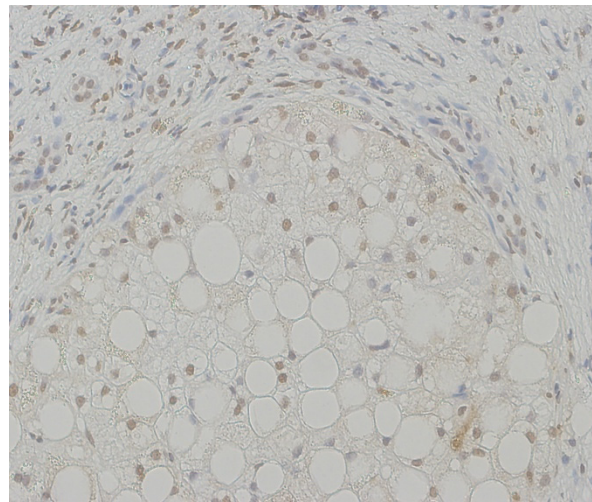

**B**

CD57 (blue) Inh (brown)

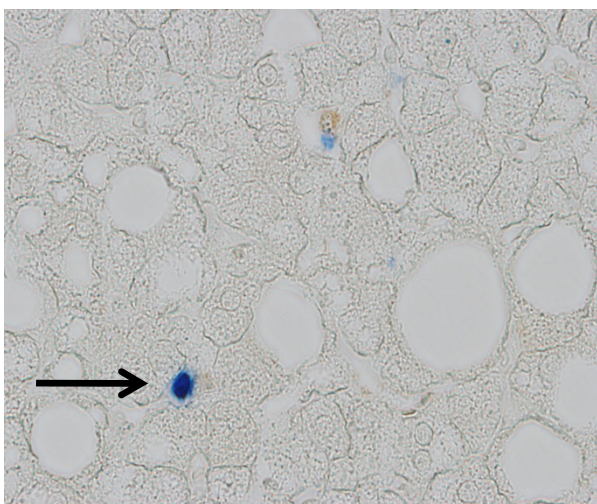

**C**

CD57 (brown) OPN (blue)

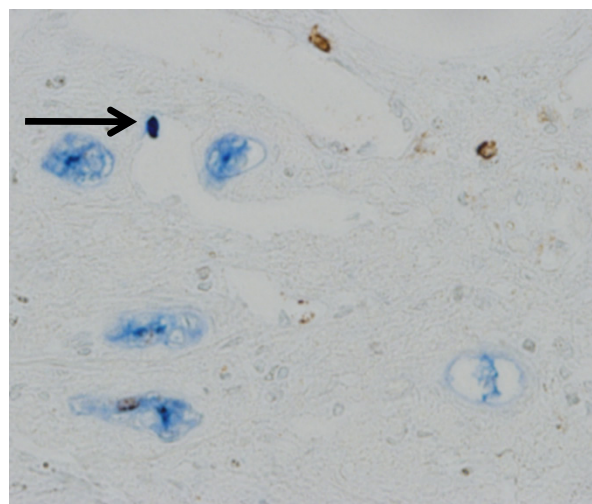

**D**

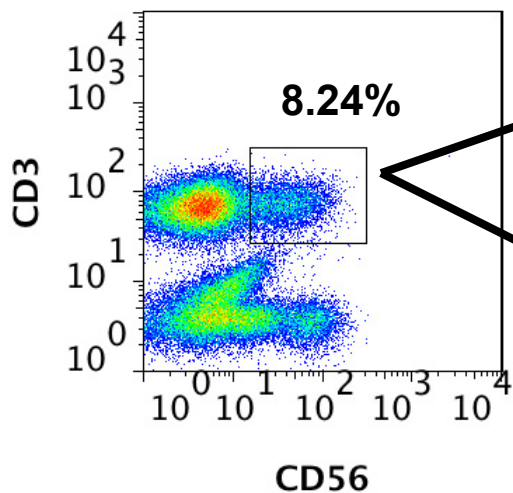

**E**

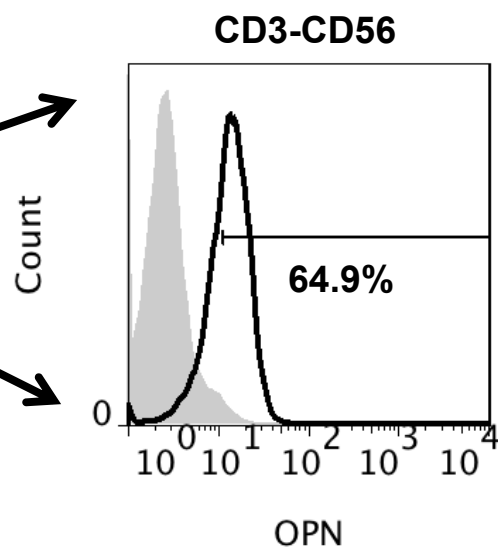

Supplement: Supplemental_NKT_figures.pdf [file Supplemental_NKT_figures.pdf]
